# Supplementary material for: Methods for Assessing Willingness to Try and Vegetable Consumption among Children in Indigenous Early Childcare Settings: The FRESH Study
Source: MDPI journal article supplement (doi:10.3390/nu14010058), 2021-12-24
Supplement: s1 [file s1]

**Supplemental Table S1a.** Sensitivity analysis of mean consumption of vegetables during observations by Farfan-Ramirez willingness-to-try (FR-WTT) categories by child's Body Mass Index (BMI)

| Vegetable FR-WTT                                           | n  | Mean Consumption<br>in grams <sup>1</sup> (SD) | P-value          |
|------------------------------------------------------------|----|------------------------------------------------|------------------|
| Among overweight or obese children (BMI $\geq$ 85%) (n=56) |    |                                                |                  |
| Tomatoes FR-WTT=4                                          | 15 | 16.4 (8.2)                                     | <b>&lt;0.001</b> |
| Tomatoes FR-WTT=0, 1, 2, 3                                 | 41 | 1.1 (1.4)                                      |                  |
| Carrots FR-WTT=4                                           | 35 | 16.8 (12.4)                                    | <b>&lt;0.001</b> |
| Carrots FR-WTT=0, 1, 2, 3                                  | 21 | 0.6 (1.2)                                      |                  |
| Spinach FR-WTT=4                                           | 25 | 2.2 (2.3)                                      | <b>0.004</b>     |
| Spinach FR-WTT=0, 1, 2, 3                                  | 31 | 0.7 (1.0)                                      |                  |
| Beans FR-WTT=4                                             | 10 | 4.1 (6.1)                                      | 0.086            |
| Beans FR-WTT=0, 1, 2, 3                                    | 46 | 0.4 (1.0)                                      |                  |
| Squash FR-WTT=4                                            | 8  | 9.4 (11.3)                                     | <b>0.042</b>     |
| Squash FR-WTT=0, 1, 2, 3                                   | 48 | -0.6 (1.3)                                     |                  |
| Peppers FR-WTT=4                                           | 13 | 7.5 (7.0)                                      | <b>0.003</b>     |
| Peppers FR-WTT=0, 1, 2, 3                                  | 43 | 0.3 (1.0)                                      |                  |
| Among normal weight children (BMI < 85%) (n=103)           |    |                                                |                  |
| Tomatoes FR-WTT=4                                          | 29 | 15.7 (8.1)                                     | <b>&lt;0.001</b> |
| Tomatoes FR-WTT=0, 1, 2, 3                                 | 74 | 0.8 (1.2)                                      |                  |
| Carrots FR-WTT=4                                           | 73 | 19.9 (10.9)                                    | <b>&lt;0.001</b> |
| Carrots FR-WTT=0, 1, 2, 3                                  | 30 | 0.2 (0.7)                                      |                  |
| Spinach FR-WTT=4                                           | 38 | 3.1 (2.2)                                      | <b>&lt;0.001</b> |
| Spinach FR-WTT=0, 1, 2, 3                                  | 65 | 0.5 (0.8)                                      |                  |
| Beans FR-WTT=4                                             | 21 | 5.3 (4.5)                                      | <b>&lt;0.001</b> |
| Beans FR-WTT=0, 1, 2, 3                                    | 82 | 0.6 (1.1)                                      |                  |
| Squash FR-WTT=4                                            | 17 | 1.6 (3.4)                                      | <b>0.014</b>     |
| Squash FR-WTT=0, 1, 2, 3                                   | 86 | -0.6 (1.0)                                     |                  |
| Peppers FR-WTT=4                                           | 20 | 7.6 (8.2)                                      | <b>0.001</b>     |
| Peppers FR-WTT=0, 1, 2, 3                                  | 83 | 0.6 (0.9)                                      |                  |

<sup>1</sup>Consumption values are rounded to one gram.

Bold denotes statistically significant difference (p<0.05).

**Supplemental Table S1b.** Sensitivity analysis of criterion and convergent validity stratified by child's Body Mass Index (BMI). Correlations between Farfan-Ramirez willingness-to-try (FR-WTT) scale and the Child Food Neophobia Scale (CFNS).

| Vegetable                                                  | Correlation between FR-WTT and CFNS scales |                 |
|------------------------------------------------------------|--------------------------------------------|-----------------|
|                                                            | Coefficient                                | P-value         |
| Among overweight or obese children (BMI $\geq$ 85%) (n=56) |                                            |                 |
| Tomatoes                                                   | -0.2369                                    | 0.07            |
| Carrots                                                    | <b>-0.3366</b>                             | <b>0.01</b>     |
| Spinach                                                    | <b>-0.3453</b>                             | <b>0.01</b>     |
| Beans                                                      | -0.0929                                    | 0.49            |
| Squash                                                     | -0.2480                                    | 0.06            |
| Peppers                                                    | <b>-0.4128</b>                             | <b>&lt;0.01</b> |
| Total                                                      | <b>-0.3948</b>                             | <b>&lt;0.01</b> |
| Among normal weight children (BMI < 85%) (n=103)           |                                            |                 |
| Tomatoes                                                   | <b>-0.2189</b>                             | <b>0.04</b>     |
| Carrots                                                    | <b>-0.2069</b>                             | <b>&lt;0.05</b> |
| Spinach                                                    | -0.0395                                    | 0.71            |
| Beans                                                      | -0.1064                                    | 0.31            |
| Squash                                                     | <b>-0.2449</b>                             | <b>0.02</b>     |
| Peppers                                                    | <b>-0.3008</b>                             | <b>&lt;0.01</b> |
| Total                                                      | <b>-0.2130</b>                             | <b>0.04</b>     |

Bold denotes statistically significant difference ( $p < 0.05$ ).
