# Supplementary material for: Methods for Assessing Willingness to Try and Vegetable Consumption among Children in Indigenous Early Childcare Settings: The FRESH Study
Source: MDPI journal article supplement (doi:10.3390/nu14010058), 2021-12-24
Supplement: s1 [file s1]

**Supplemental Table S2a.** Sensitivity analysis of mean consumption of vegetables during observations by Farfan-Ramirez willingness-to-try (FR-WTT) categories by household food security.

| Vegetable FR-WTT                                                                     | n  | Mean Consumption<br>in grams <sup>1</sup> (SD) | P-value |
|--------------------------------------------------------------------------------------|----|------------------------------------------------|---------|
| Among children living in households reporting low or very low food security (n=59)   |    |                                                |         |
| Tomatoes FR-WTT=4                                                                    | 16 | 16.6 (7.6)                                     | <0.001  |
| Tomatoes FR-WTT=0, 1, 2, 3                                                           | 43 | 0.7 (1.1)                                      |         |
| Carrots FR-WTT=4                                                                     | 40 | 17.9 (10.5)                                    | <0.001  |
| Carrots FR-WTT=0, 1, 2, 3                                                            | 19 | 0.5 (1.1)                                      |         |
| Spinach FR-WTT=4                                                                     | 19 | 2.7 (2.0)                                      | <0.001  |
| Spinach FR-WTT=0, 1, 2, 3                                                            | 40 | 0.4 (1.0)                                      |         |
| Beans FR-WTT=4                                                                       | 11 | 5.5 (6.0)                                      | 0.017   |
| Beans FR-WTT=0, 1, 2, 3                                                              | 48 | 0.4 (1.3)                                      |         |
| Squash FR-WTT=4                                                                      | 7  | 1.1 (2.4)                                      | 0.156   |
| Squash FR-WTT=0, 1, 2, 3                                                             | 52 | -0.3 (1.2)                                     |         |
| Peppers FR-WTT=4                                                                     | 11 | 7.2 (5.8)                                      | 0.003   |
| Peppers FR-WTT=0, 1, 2, 3                                                            | 48 | 0.3 (1.0)                                      |         |
| Among children living in households reporting food high and marginal security (n=92) |    |                                                |         |
| Tomatoes FR-WTT=4                                                                    | 23 | 16.1 (7.4)                                     | <0.001  |
| Tomatoes FR-WTT=0, 1, 2, 3                                                           | 69 | 1.1 (1.3)                                      |         |
| Carrots FR-WTT=4                                                                     | 61 | 19.8 (12.0)                                    | <0.001  |
| Carrots FR-WTT=0, 1, 2, 3                                                            | 31 | 0.3 (0.9)                                      |         |
| Spinach FR-WTT=4                                                                     | 39 | 2.7 (2.2)                                      | <0.001  |
| Spinach FR-WTT=0, 1, 2, 3                                                            | 53 | 0.7 (0.9)                                      |         |
| Beans FR-WTT=4                                                                       | 15 | 4.7 (4.1)                                      | 0.002   |
| Beans FR-WTT=0, 1, 2, 3                                                              | 77 | 0.5 (1.0)                                      |         |
| Squash FR-WTT=4                                                                      | 14 | 4.8 (8.5)                                      | 0.030   |
| Squash FR-WTT=0, 1, 2, 3                                                             | 78 | -0.8 (1.1)                                     |         |
| Peppers FR-WTT=4                                                                     | 21 | 8.0 (8.6)                                      | 0.001   |
| Peppers FR-WTT=0, 1, 2, 3                                                            | 71 | 0.5 (0.9)                                      |         |

<sup>1</sup>Consumption values are rounded to one gram.

**Supplemental Table S2b.** Sensitivity analysis of criterion and convergent validity stratified by household food security. Correlations between Farfan-Ramirez willingness-to-try (FR-WTT) scale and the Child Food Neophobia Scale (CFNS).

| Vegetable                                                                            | Correlation between FR-WTT and CFNS scales |                 |
|--------------------------------------------------------------------------------------|--------------------------------------------|-----------------|
|                                                                                      | Coefficient                                | P-value         |
| Among children living in households reporting low or very low food security (n=59)   |                                            |                 |
| Tomatoes                                                                             | -0.2369                                    | 0.07            |
| Carrots                                                                              | <b>-0.3366</b>                             | <b>0.01</b>     |
| Spinach                                                                              | <b>-0.3453</b>                             | <b>0.01</b>     |
| Beans                                                                                | -0.0929                                    | 0.49            |
| Squash                                                                               | -0.2480                                    | 0.06            |
| Peppers                                                                              | <b>-0.4128</b>                             | <b>&lt;0.01</b> |
| Total                                                                                | <b>-0.3948</b>                             | <b>&lt;0.01</b> |
| Among children living in households reporting food high and marginal security (n=92) |                                            |                 |
| Tomatoes                                                                             | <b>-0.3082</b>                             | <b>&lt;0.01</b> |
| Carrots                                                                              | <b>-0.2910</b>                             | <b>0.01</b>     |
| Spinach                                                                              | -0.0839                                    | 0.44            |
| Beans                                                                                | -0.1146                                    | 0.29            |
| Squash                                                                               | <b>-0.2481</b>                             | <b>0.02</b>     |
| Peppers                                                                              | <b>-0.2820</b>                             | <b>0.02</b>     |
| Total                                                                                | <b>-0.3028</b>                             | <b>&lt;0.01</b> |
