# Supplementary material for: Methods for Assessing Willingness to Try and Vegetable Consumption among Children in Indigenous Early Childcare Settings: The FRESH Study
Source: MDPI journal article supplement (doi:10.3390/nu14010058), 2021-12-24
Supplement: s1 [file s1]

**Supplemental Table S3a.** Sensitivity analysis of mean consumption of vegetables during observations by Farfan-Ramirez willingness-to-try (FR-WTT) categories by child's age.

| <b>Vegetable FR-WTT</b>                               | <b>n</b> | <b>Mean Consumption<br/>in grams<sup>1</sup> (SD)</b> | <b>P-value</b> |
|-------------------------------------------------------|----------|-------------------------------------------------------|----------------|
| <b>Among younger children (&lt;4.7 years), (n=89)</b> |          |                                                       |                |
| Tomatoes FR-WTT=4                                     | 25       | 16.2 (8.2)                                            | <0.001         |
| Tomatoes FR-WTT=0, 1, 2, 3                            | 64       | 1.0 (1.3)                                             |                |
| Carrots FR-WTT=4                                      | 59       | 14.8 (11.3)                                           | <0.001         |
| Carrots FR-WTT=0, 1, 2, 3                             | 30       | 0.4 (0.9)                                             |                |
| Spinach FR-WTT=4                                      | 31       | 2.3 (2.1)                                             | <0.001         |
| Spinach FR-WTT=0, 1, 2, 3                             | 58       | 0.5 (0.9)                                             |                |
| Beans FR-WTT=4                                        | 13       | 5.5 (5.3)                                             | 0.006          |
| Beans FR-WTT=0, 1, 2, 3                               | 76       | 0.6 (1.1)                                             |                |
| Squash FR-WTT=4                                       | 10       | 6.1 (9.1)                                             | 0.046          |
| Squash FR-WTT=0, 1, 2, 3                              | 79       | -0.5 (1.0)                                            |                |
| Peppers FR-WTT=4                                      | 17       | 6.5 (6.8)                                             | 0.002          |
| Peppers FR-WTT=0, 1, 2, 3                             | 72       | 0.4 (1.0)                                             |                |
| <b>Among older children (≥4.7 years), (n=73)</b>      |          |                                                       |                |
| Tomatoes FR-WTT=4                                     | 19       | 15.6 (7.9)                                            | <0.001         |
| Tomatoes FR-WTT=0, 1, 2, 3                            | 54       | 0.8 (1.3)                                             |                |
| Carrots FR-WTT=4                                      | 49       | 23.7 (9.7)                                            | <0.001         |
| Carrots FR-WTT=0, 1, 2, 3                             | 24       | 0.4 (1.1)                                             |                |
| Spinach FR-WTT=4                                      | 32       | 3.1 (2.3)                                             | <0.001         |
| Spinach FR-WTT=0, 1, 2, 3                             | 41       | 0.7 (0.9)                                             |                |
| Beans FR-WTT=4                                        | 18       | 4.6 (4.9)                                             | 0.002          |
| Beans FR-WTT=0, 1, 2, 3                               | 55       | 0.5 (1.0)                                             |                |
| Squash FR-WTT=4                                       | 15       | 2.8 (6.5)                                             | 0.060          |
| Squash FR-WTT=0, 1, 2, 3                              | 58       | -0.7 (1.2)                                            |                |
| Peppers FR-WTT=4                                      | 16       | 8.8 (8.4)                                             | 0.001          |
| Peppers FR-WTT=0, 1, 2, 3                             | 57       | 0.5 (0.8)                                             |                |

<sup>1</sup>Consumption values are rounded.

**Supplemental Table S3b.** Sensitivity analysis of criterion and convergent validity stratified by child's age. Correlations between Farfan-Ramirez willingness-to-try (FR-WTT) scale and the Child Food Neophobia Scale (CFNS).

| Vegetable                                   | Correlation between FR-WTT and CFNS scales |                 |
|---------------------------------------------|--------------------------------------------|-----------------|
|                                             | Coefficient                                | P-value         |
| Among younger children (<4.7 years), (n=89) |                                            |                 |
| Tomatoes                                    | <b>-0.2611</b>                             | <b>0.02</b>     |
| Carrots                                     | <b>-0.2673</b>                             | <b>0.02</b>     |
| Spinach                                     | -0.1951                                    | 0.08            |
| Beans                                       | 0.0562                                     | 0.62            |
| Squash                                      | -0.2174                                    | 0.05            |
| Peppers                                     | <b>-0.2919</b>                             | <b>0.02</b>     |
| Total                                       | <b>-0.3179</b>                             | <b>&lt;0.01</b> |
| Among older children (≥4.7 years), (n=73)   |                                            |                 |
| Tomatoes                                    | <b>-0.3107</b>                             | <b>0.01</b>     |
| Carrots                                     | <b>-0.3419</b>                             | <b>0.01</b>     |
| Spinach                                     | -0.1593                                    | 0.20            |
| Beans                                       | <b>-0.2604</b>                             | <b>0.03</b>     |
| Squash                                      | <b>-0.2759</b>                             | <b>0.02</b>     |
| Peppers                                     | <b>-0.3684</b>                             | <b>&lt;0.01</b> |
| Total                                       | <b>-0.3464</b>                             | <b>&lt;0.01</b> |
